# Supplementary material for: Carbon Abatement and Emissions Associated with the Gasification of Walnut Shells for Bioenergy and Biochar Production
Source: PLOS journal article supplement (doi:10.1371/journal.pone.0150837), 2016-03-10
Supplement: S3 (10.1371/journal.pone.0150837.s003) [file journal.pone.0150837.s003]

**S1 Table:** List of management and precipitation events that occurred at Dixon Ridge Farm (Winters, CA, USA) during the 29 months of this study.

| Event    | Sampling period | Activity                     | Date               |
|----------|-----------------|------------------------------|--------------------|
| Event 1  | GS1             | Irrigation                   | July 8, 2010       |
| Event 2  | GS1             | Tillage                      | July 27, 2010      |
| Event 3  | GS1             | Irrigation                   | August 12, 2010    |
| Event 4  | GS1             | Harvest                      | October 2, 2010    |
| Event 5  | TD1             | Precipitation                | October 25, 2010   |
| Event 6  | TD1             | Precipitation                | November 8, 2010   |
| Event 7  | TD1             | Precipitation                | November 28, 2010  |
| Event 8  | TD1             | Mowing                       | April 8, 2011      |
| Event 9  | GS2             | Mowing and Irrigation        | June 21, 2011      |
| Event 10 | GS2             | Irrigation                   | July 26, 2011      |
| Event 11 | GS2             | Irrigation                   | August 11, 2011    |
| Event 12 | GS2             | Fertilization and Irrigation | August 30, 2011    |
| Event 13 | GS2             | Precipitation and mowing     | September 26, 2011 |
| Event 14 | GS2             | Precipitation                | October 6, 2011    |
| Event 15 | GS2             | Harvest                      | October 24, 2011   |
| Event 16 | TD2             | Precipitation                | November 4, 2011   |
| Event 17 | TD2             | Precipitation                | January 21, 2012   |
| Event 18 | TD2             | Precipitation                | March 19, 2012     |
| Event 19 | TD2             | Irrigation                   | May 27, 2012       |
| Event 20 | GS3             | Mowing                       | June 8, 2012       |
| Event 21 | GS3             | Irrigation                   | June 16, 2012      |
| Event 22 | GS3             | Irrigation                   | June 25, 2012      |
| Event 23 | GS3             | Harvest                      | October 22, 2012   |
